# Supplementary material for: Dissociable Modulation of Overt Visual Attention in Valence and Arousal Revealed by Topology of Scan Path
Source: PubMed Central journal article supplement (PMC3071806; doi:10.1371/journal.pone.0018262), 2011-04-06
Supplement: pone.0018262.s002.pdf [file pone.0018262.s002.pdf]

**Table S1** The linear effect in valence

| Metrics | Graded Valence Effect | Linear Trend Test                 |
|---------|-----------------------|-----------------------------------|
| Weight  | H > M > L             | $F_{(1,3378)}=5.944$ , $p=0.015$  |
| SAP     | H > M > L             | $F_{(1,3450)}=2.651$ , $p=0.104$  |
| PKV     | H > M > L             | $F_{(1,3450)}=6.237$ , $p=0.013$  |
| SAG     | H > M > L             | $F_{(1,3450)}=13.616$ , $p=0.000$ |
| PUL     | H < M < L             | $F_{(1,3667)}=88.190$ , $p=0.000$ |
| TCC_PUL | H < M < L             | $F_{(1,14)}=66.022$ , $p=0.000$   |
| TCC_PKV | H > L, H > M          | $F_{(1,14)}=5.471$ , $p=0.035$    |

The linear valence effect was test by ANOVA and Turkey's post hoc test. H = high affective level; M = medium affective level; L = low affective level. TCC\_PUL = pupillary reflex curves; TCC\_PKV = time course curve of PKV.
