# Supplementary material for: Dissociable Modulation of Overt Visual Attention in Valence and Arousal Revealed by Topology of Scan Path
Source: PubMed Central journal article supplement (PMC3071806; doi:10.1371/journal.pone.0018262), 2011-04-06
Supplement: pone.0018262.s003.pdf [file pone.0018262.s003.pdf]

**Table S2** The nonlinear effect in arousal

| Metrics   | Graded Arousal Effect | Quadratic Trend Test      |
|-----------|-----------------------|---------------------------|
| Weight    | M < H < L             | F(1,3378)=3.278, p=0.070  |
| Diameter  | M > H > L             | F(1,214)=29.057, p<0.001  |
| Fiedler   | M < L                 | F(1,216)=2.291, p=0.132   |
| $\xi_2$   | M < L                 | F(1,216)=2.560, p=0.111   |
| $\xi_3$   | M < L                 | F(1,216)=3.688, p=0.056   |
| <i>a</i>  | M > L, H > L          | F(1,216)=23.139, p<0.001  |
| <i>c</i>  | M > L, H > L          | F(1,216)=13.348, p<0.001  |
| $\beta_1$ | M < L, H < L          | F(1,216)=10.950, p=0.001  |
| $\beta_3$ | M > L                 | F(1,213)=3.924, p=0.049   |
| SDR       | M < H < L             | F(1,213)=18.911, p<0.001  |
| DRA       | M < H < L             | F(1,3308)=33.717, p<0.001 |
| PUL       | M < H < L             | F(1,3308)=6.566, p=0.010  |
| FNum      | H > L, M > L          | F(1,219)=32.010, p<0.001  |
| PKV       | M < H < L             | F(1,3089)=8.907, p=0.003  |
| TCC_PUL   | M < H < L             | F(1,14)=59.078, p<0.001   |
| TCC_DRA   | M < H < L             | F(1,14)=51.830, p<0.001   |
| TCC_PKV   | M < L, H < L          | F(1,14)=15.877, p=0.001   |
| TCC_SDR   | M < H < L             | F(1,14)=15.295, p=0.002   |

The nonlinear effect was test by ANOVA and Turkey's post hoc test. H = high affective level; M = medium affective level; L = low affective level. TCC\_PUL = pupillary reflex curve; TCC\_DRA = time course curve of DRA; TCC\_PKV= time course curve of PKV; TCC\_SDR = time course curve of SDR.
