# Supplementary material for: Dissociable Modulation of Overt Visual Attention in Valence and Arousal Revealed by Topology of Scan Path
Source: PubMed Central journal article supplement (PMC3071806; doi:10.1371/journal.pone.0018262), 2011-04-06
Supplement: pone.0018262.s004.pdf [file pone.0018262.s004.pdf]

**Table S3 IAPS Series Number of Pictures**

| BLOCK   |   | Female Subjects                                               | Male Subjects                                            |
|---------|---|---------------------------------------------------------------|----------------------------------------------------------|
| Valence | H | 2040, 1710, 2347, 5833, 2550,<br>1811, 1463, 1590, 4574, 7430 | 1440,2150,2340,5825,8420,<br>1710,2154,2398,7200,8510    |
|         | M | 8211,2351,8260,1560,2122,<br>1980,8065,2780,1645,8232         | 1101,1645,2458,3550.2,7248,<br>1390,2220,3210,6800,7497, |
|         | L | 9295,2799,9560,2900.1,9830,<br>2751,3181,2375.1,9435,2205     | 2095,3015,3064,3180,9185,<br>2800,3063,3101,9040,9405    |
| Arousal | H | 8179,8160,8178,1321,1931,<br>5950,8475,8341,8206,3250         | 1120,1931,8065,8160,8192,<br>1321,5940,8158,8191,8475    |
|         | M | 7497,7211,4613,2372,7488,<br>7137,5455,1313,4631,7504         | 1240,2704,4613,7476,8041,<br>1303,4233,6940,7620,8232    |
|         | L | 7059,2381,7187,7060,7491,<br>7020,7000,7010,7004,7175         | 2501,7004,7010,7080,7175,<br>5800,7006,7020,7110,7900    |

H = High level; M = Medium level; L = Low level.
